# Supplementary material for: Comparing Community Needs and REDD+ Activities for Capacity Building and Forest Protection in the Équateur Province of the Democratic Republic of Congo
Source: MDPI journal article supplement (doi:10.3390/land11060918), 2022-06-15
Supplement: s1 [file s1]

## Supplementary Information for: Comparing Community Needs and REDD+ Activities for Capacity Building and Forest Protection in the Equateur Province of the Democratic Republic of Congo

**Table S1** Gender of survey respondents for each village and town

| <b>Gender</b> | <b>Bongonde Drapeau</b> | <b>Buya 1</b> | <b>Mbandaka</b> | <b>Total</b> |
|---------------|-------------------------|---------------|-----------------|--------------|
| Male          | 44                      | 37            | 30              | 111          |
| Female        | 19                      | 26            | 1               | 46           |

**Table S2** Age range of respondents for each village and town

| <b>Age Range</b> | <b>Bongonde Drapeau</b> | <b>Buya 1</b> | <b>Mbandaka</b> | <b>Total</b> |
|------------------|-------------------------|---------------|-----------------|--------------|
| 18–30            | 10                      | 12            | 1               | 23           |
| 31–40            | 14                      | 15            | 4               | 33           |
| 41–50            | 17                      | 17            | 9               | 43           |
| 51–60            | 15                      | 12            | 17              | 44           |
| Over 61          | 7                       | 7             | 0               | 14           |
| <b>Total</b>     | <b>63</b>               | <b>63</b>     | <b>31</b>       | <b>157</b>   |

**Table S3** Self-identified status/strata of survey respondents for each village and town.

| <b>Status/strata</b> | <b>Village/Town</b> |                         |                 | <b>Total</b> |
|----------------------|---------------------|-------------------------|-----------------|--------------|
|                      | <b>Buya 1</b>       | <b>Bongonde Drapeau</b> | <b>Mbandaka</b> |              |
| Indigenous People    | 9                   | 9                       | 2               | <b>20</b>    |
| Venants              | 9                   | 9                       | 8               | <b>26</b>    |
| Rights Holders       | 9                   | 9                       | —               | <b>18</b>    |
| Pauvres              | 9                   | 9                       | 6               | <b>24</b>    |
| Middle Class         | 9                   | 9                       | 12              | <b>30</b>    |
| Rich                 | 9                   | 9                       | 2               | <b>20</b>    |
| Mothers              | 9                   | 9                       | —               | <b>18</b>    |
| Business people      | 0                   | 0                       | 1               | <b>1</b>     |
| <b>Total</b>         | <b>63</b>           | <b>63</b>               | <b>30</b>       |              |

**Table S4** Sectoral breakdown of survey respondents

|                                                              |            |
|--------------------------------------------------------------|------------|
| Community forest users                                       | 2          |
| Agriculture                                                  | 106        |
| Government/public sector – provincial level                  | 5          |
| Government/public sector – national level                    | 11         |
| REDD+ or related project secretariat, or administration body | 1          |
| Forest-based industry                                        | 0          |
| Commerce                                                     | 8          |
| Finance                                                      | 1          |
| NGO – Environment                                            | 7          |
| NGO – Social                                                 | 1          |
| Research/Academic/University                                 | 6          |
| Zoological organisation                                      | 0          |
| Other                                                        | 9          |
| <b>Total</b>                                                 | <b>157</b> |

**Table S5** Levels and Types of Capacity Building

| <b>Scales</b>         |                                                                                                                             |
|-----------------------|-----------------------------------------------------------------------------------------------------------------------------|
| <b>Individual</b>     | Improving the capacity of individuals, such as training.                                                                    |
| <b>Organisational</b> | Improving capacity of small groups or organisations (includes communities).                                                 |
| <b>Sectoral</b>       | Improving the capacity within a sector, e.g. agricultural, forestry.                                                        |
| <b>Institutional</b>  | Improving the interactions between organisations, departments etc. to improve decision-making and governance.               |
| <b>Systemic</b>       | Improving the 'enabling environment' in which activities occur.                                                             |
| <b>Types</b>          |                                                                                                                             |
| <b>Technical</b>      | Improving skills or knowledge in particular area of expertise, e.g. mapping, planning, engagement, communication etc.       |
| <b>Functional</b>     | Improving management capacities needed to formulate, implement and review policies, strategies, programmes and projects     |
| <b>Participative</b>  | Improving the openness of processes and the involvement of stakeholders (includes awareness raising)                        |
| <b>Integrative</b>    | Improving coordination and cooperation across stakeholders, organisations, sectors, departments etc.                        |
| <b>Strategic</b>      | Improving the development and implementation of comprehensive and long-term objectives.                                     |
| <b>Adaptive</b>       | Improving the ability of a system to adjust to change, to take advantage of opportunities, or to cope with the consequences |

**Table S6:** Examples of scales and types of capacity building, with examples relevant to REDD+

|       |                       | TYPE                                                                    |                                                                                                                 |                                                                                                                       |                                                                          |                                                  |                                                                               |
|-------|-----------------------|-------------------------------------------------------------------------|-----------------------------------------------------------------------------------------------------------------|-----------------------------------------------------------------------------------------------------------------------|--------------------------------------------------------------------------|--------------------------------------------------|-------------------------------------------------------------------------------|
|       |                       | Technical                                                               | Functional                                                                                                      | Participative                                                                                                         | Integrative                                                              | Strategic                                        | Adaptive                                                                      |
| SCALE | <b>Individual</b>     | Forest ranger training or permaculture workshops                        | Management training or entrepreneurial workshops                                                                | Resources to support the involvement of community members in workshops                                                | Agricultural roundtables with industry, community and government         | Planning training                                | Training in new agricultural techniques                                       |
|       | <b>Organisational</b> | Building the GIS capabilities of forestry department                    | Resources to improve internal policies and procedures in a local NGO.                                           | Community engagement training and awareness                                                                           | Developing peak body associations                                        | Developing community-based plans                 | Developing community-level climate change adaptation plans                    |
|       | <b>Sectoral</b>       | Ensuring knowledge sharing between forestry and environment departments | Developing policies to identify responsibilities and resources across a sector                                  | Developing forestry FPIC policies and procedures                                                                      | Inter-departmental roundtables                                           | Creating forest management plan                  | Introducing new crop varieties                                                |
|       | <b>Institutional</b>  | Improving community engagement skills of civil servants                 | Developing policies for transparent decision-making                                                             | Increasing the ability of stakeholders to engage with and influence the political arena and the socio-economic system | Developing policies to reduce conflict between departments               | Developing regional strategic landscape planning | Developing climate change adaptation plans                                    |
|       | <b>Systemic</b>       | Including sustainability into education system at all levels            | Creating necessary governance arrangements for improving integrity and legitimacy of government decision-making | Building participative and deliberative systems of governance                                                         | Encouraging integrated and holistic approaches to be taken at all levels | Encouraging long term thinking at all levels     | Supporting ongoing change management, adaptation and willingness to transform |

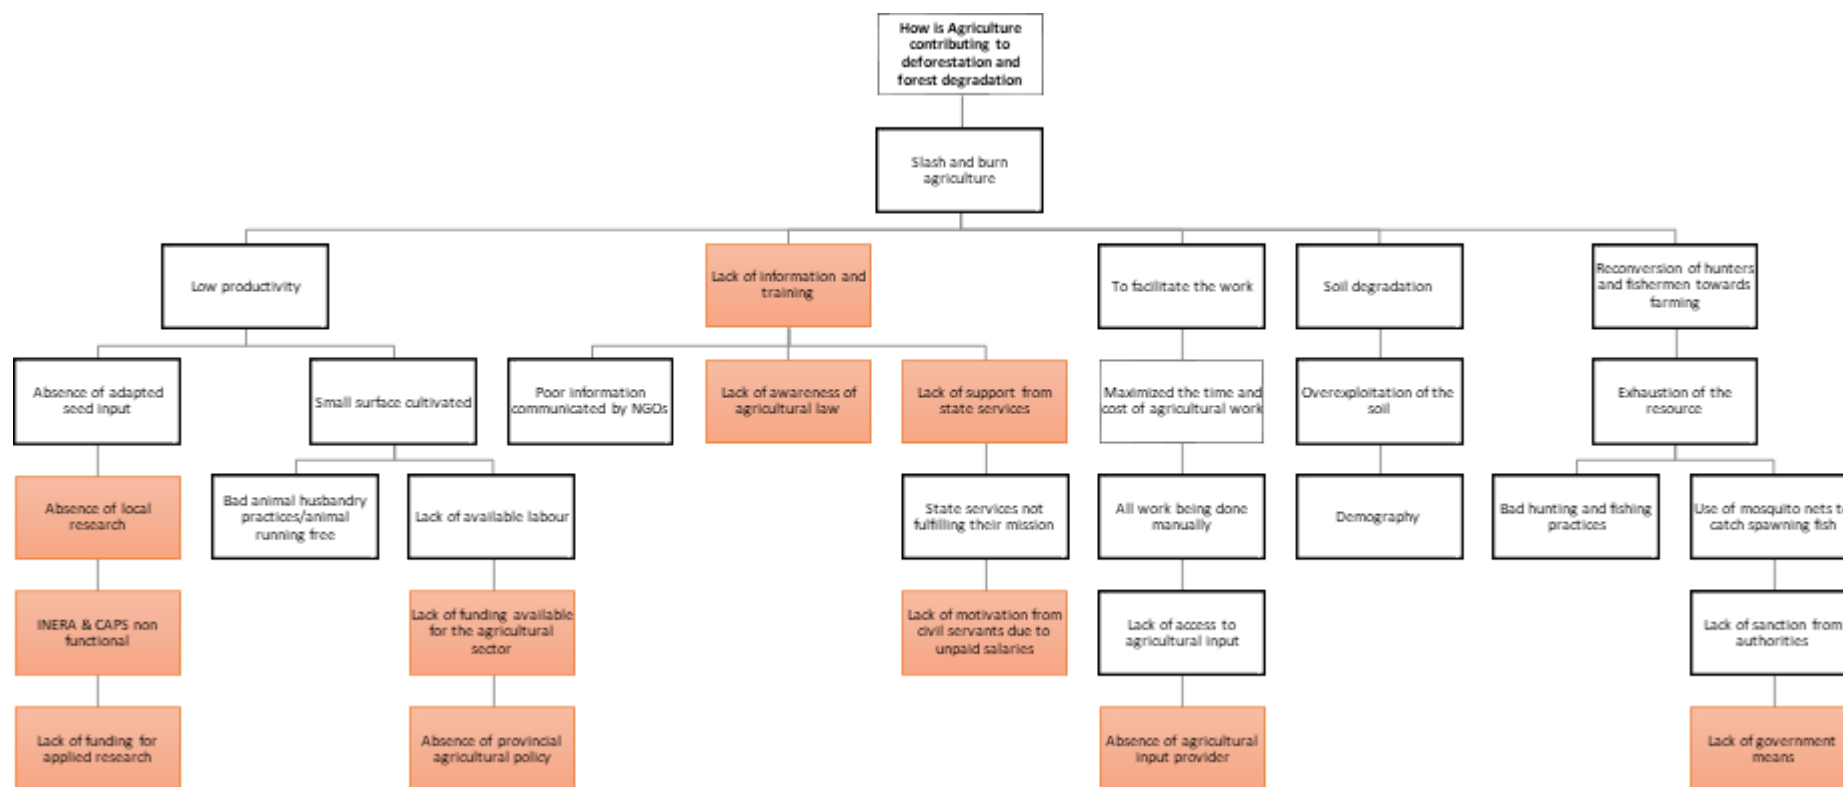

Figure S1: Problem tree for the agricultural sector. (INERA – National Institute for Agronomic Study and Research, CAPS – Adaptation Center for Principal Seeds.)

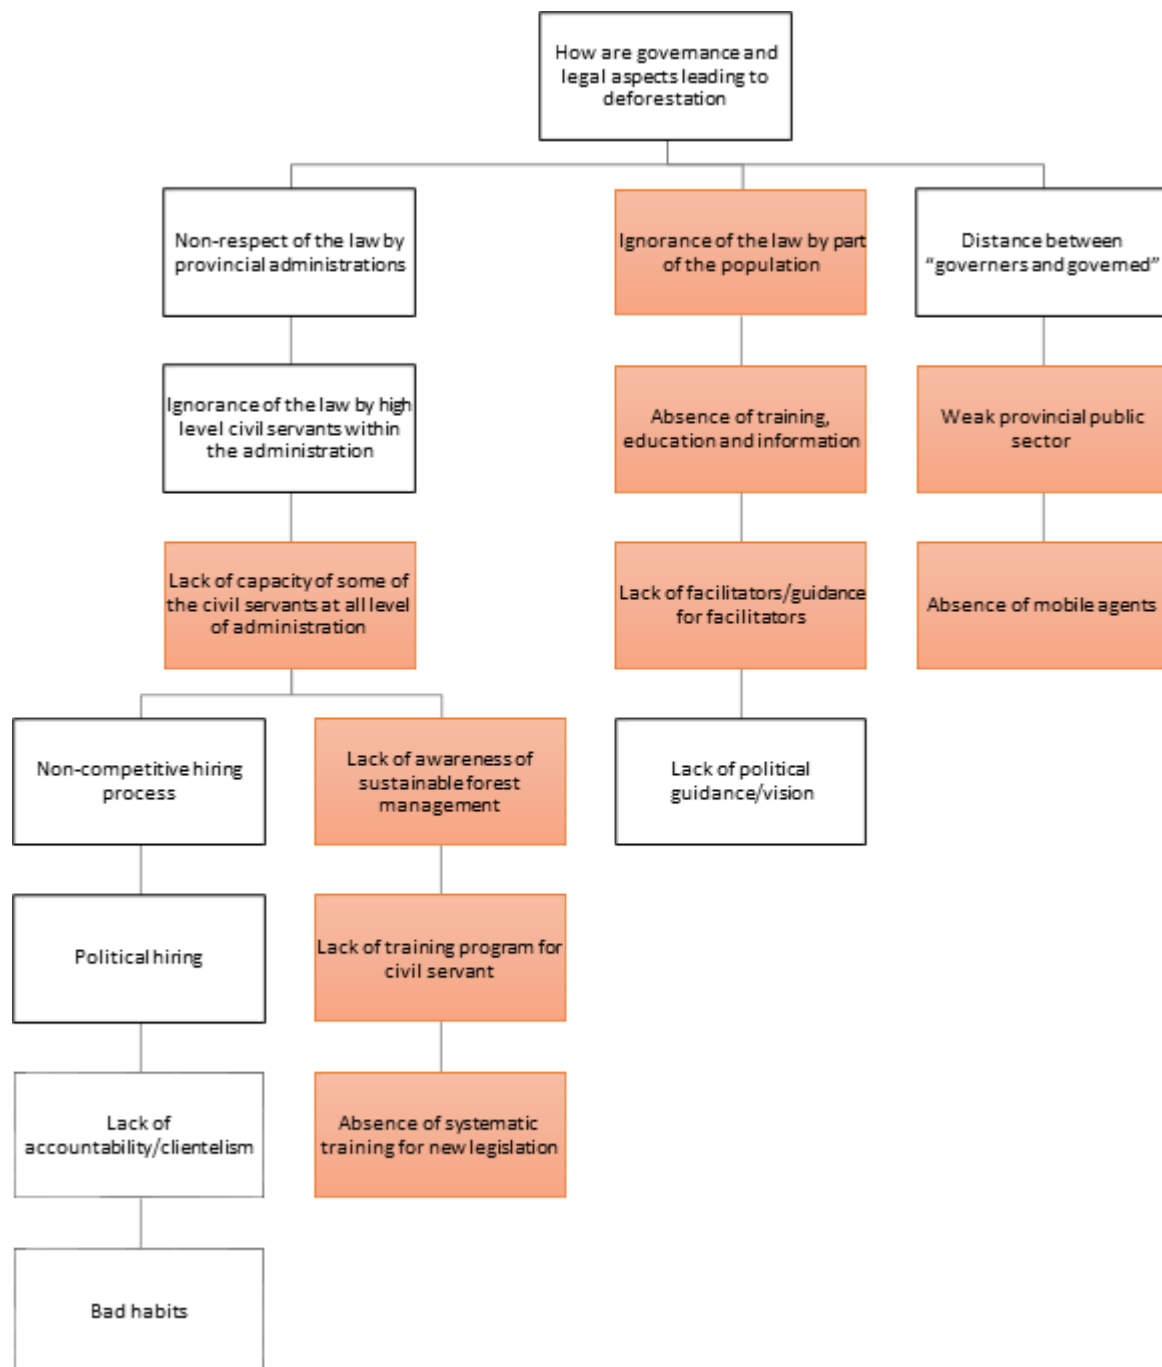

Figure S2: Forest loss and degradation problem tree for governance and legal aspects

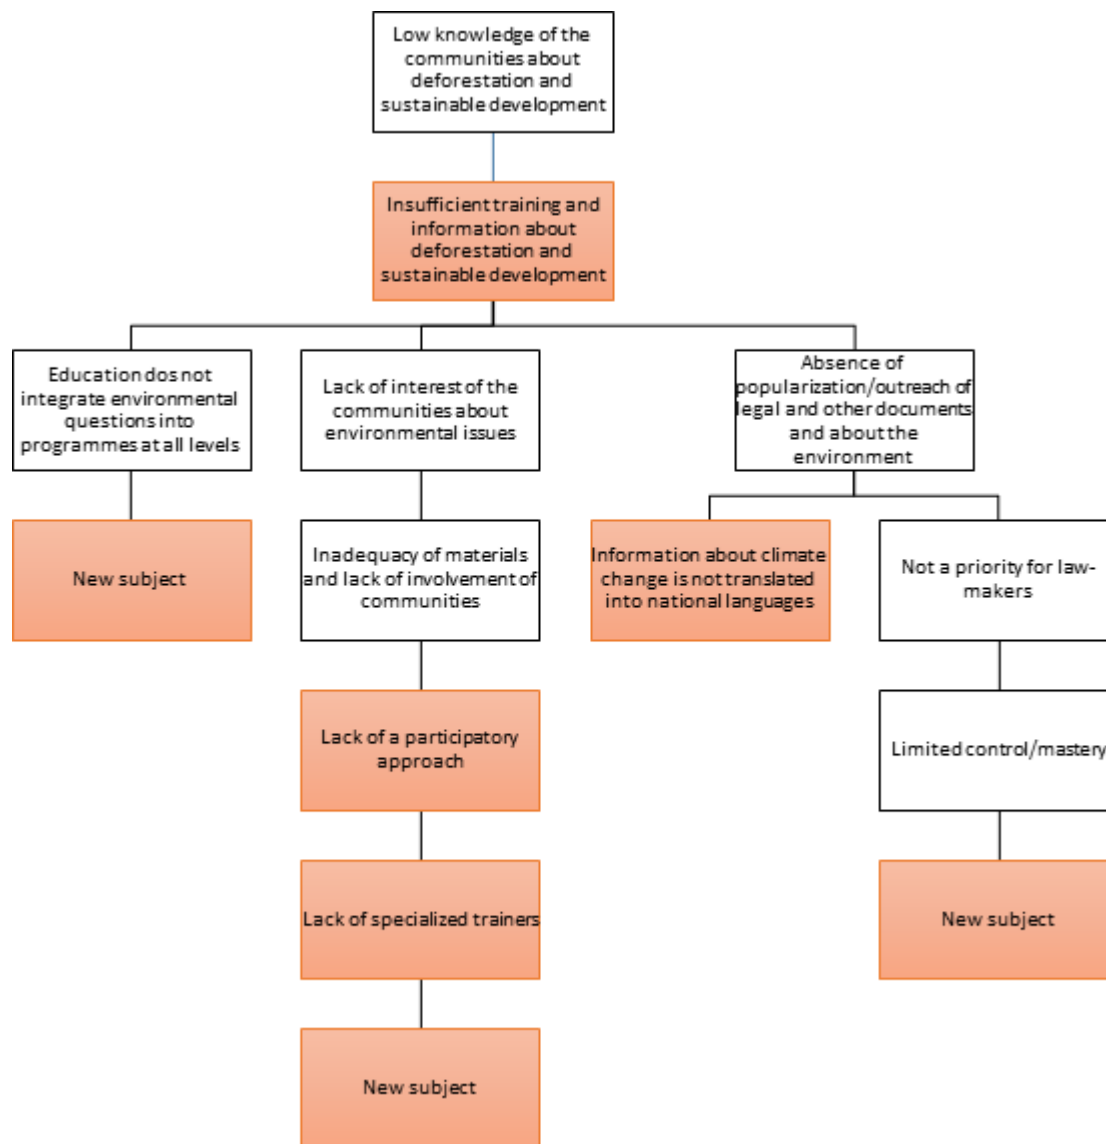

Figure S3: Forest loss and degradation problem tree for capacity building.

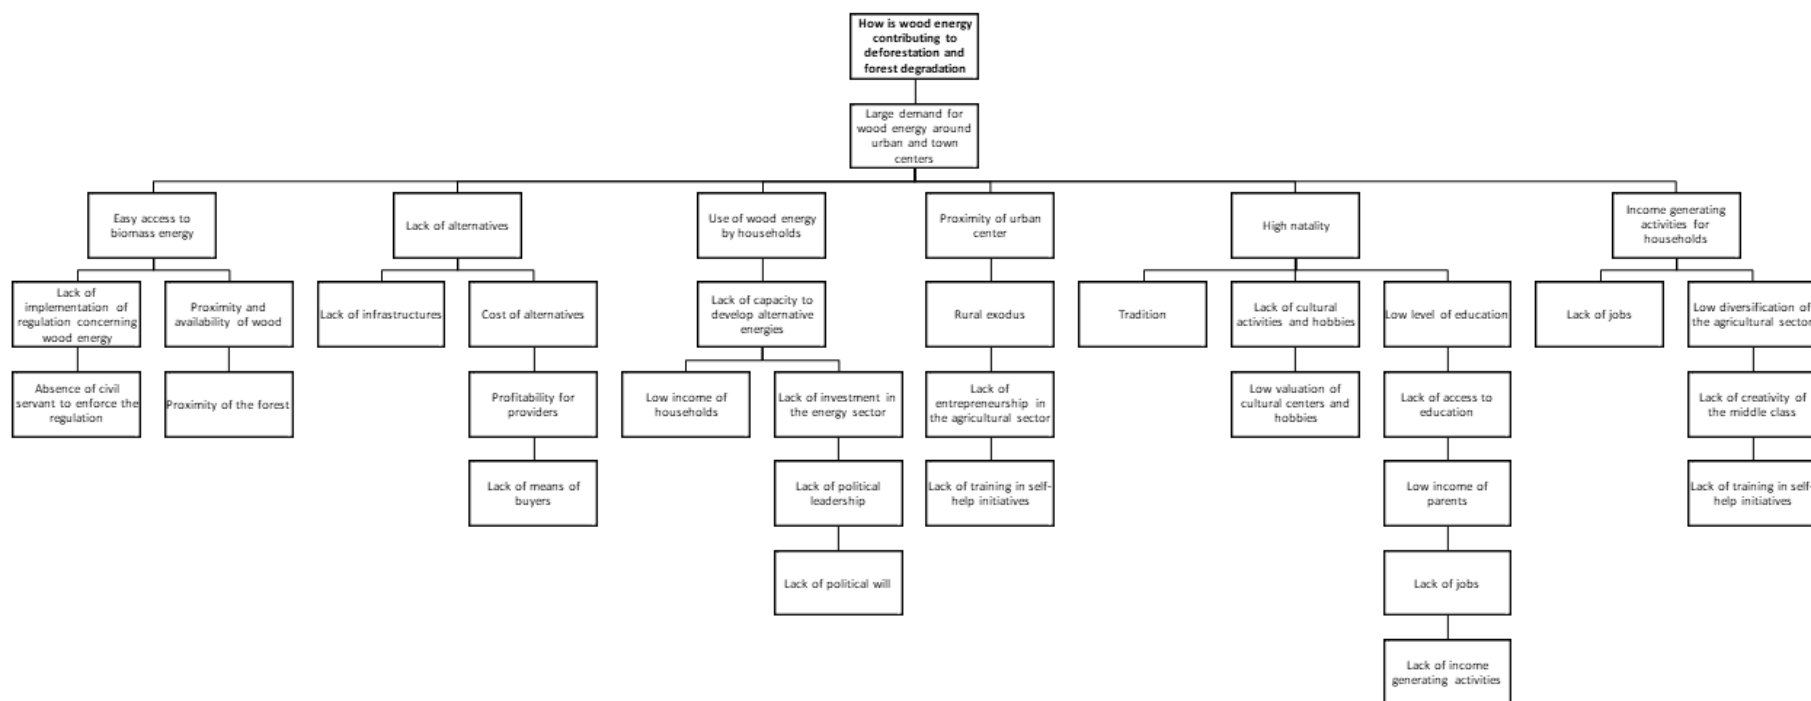

Figure S4: Forest loss and degradation problem tree for biomass sector (not used in analysis).

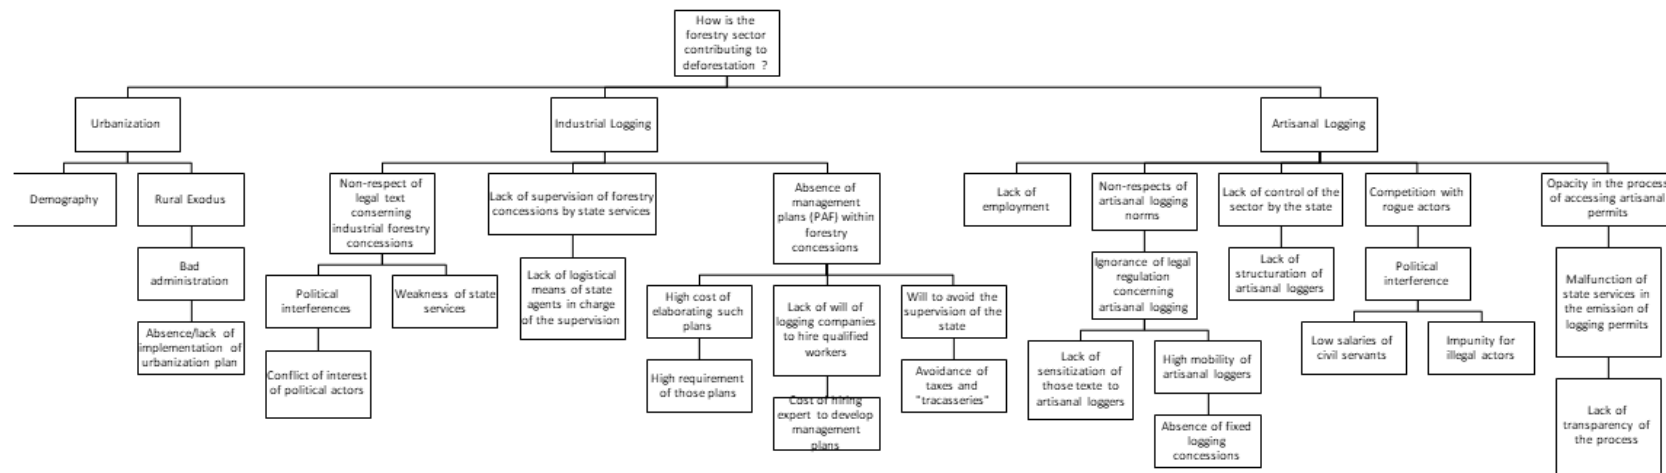

Figure S5: Forest loss and degradation problem tree for forestry sector (not used in analysis).



**Table S7:** Capacity type and scale assessment of REDD+ capacity building activities

| REDD+ Strategy Capacity Building Activities                                                                                                                | Capacity Needs                           |                                 |
|------------------------------------------------------------------------------------------------------------------------------------------------------------|------------------------------------------|---------------------------------|
|                                                                                                                                                            | Type                                     | Scale                           |
| <b>Pillar One Agriculture</b>                                                                                                                              |                                          |                                 |
| I.3. Promote participation in sustainable production roundtables                                                                                           | Technical                                | Individual<br>Organisational    |
| I.5. Support the structuring of local communities into Local Development Committees (LDCs)                                                                 | Functional                               | Institutional                   |
| I.6. Support and strengthen the capacities of steering and consultation frameworks at the higher levels of local governance (Groups, Sectors, Territories) | Functional<br>Participative              | Organisational<br>Institutional |
| I.7. To support any form of initiative related to sustainable agriculture aimed at organizing stakeholders in the commodity chains                         | Technical<br>Functional<br>Participative | Organisational<br>Sectoral      |
| I.11. Making the Development Committees responsible for the management of development plans at local level (cf. Spatial Planning Pillar)                   | Strategic                                | Institutional                   |
| I.13. Supporting the emergence of financial services in rural areas in support of sustainable agricultural practices                                       | Functional                               | Organisational<br>Sectoral      |
| I.14. Experimenting with various financial instruments to support agricultural operators involved in a REDD+ approach                                      | Functional                               | Organisational<br>Sectoral      |
| I.15. Support research for the development of technical reference systems for sustainable agriculture, on the links between agriculture and forestry       | Technical                                | Organisational<br>Sectoral      |
| I.16. Renewing technical services and building their capacity on sustainable agriculture technologies                                                      | Technical                                | Organisational                  |
|                                                                                                                                                            | Functional                               |                                 |
| I.17. Strengthen the capacities of peasant and village organizations, intermediary NGOs and private operators in the same direction                        | Integrative                              | Organisational                  |
|                                                                                                                                                            | Technical                                | Individual                      |

| REDD+ Strategy Capacity Building Activities                                                                                                                                         | Capacity Needs               |                |
|-------------------------------------------------------------------------------------------------------------------------------------------------------------------------------------|------------------------------|----------------|
|                                                                                                                                                                                     | Type                         | Scale          |
|                                                                                                                                                                                     | Participatory<br>Adaptive    | Organisational |
| <b>Pillar 2 Energy</b>                                                                                                                                                              |                              |                |
| 2.6. Developing national expertise in the various types of alternative energy to wood energy and sustainable wood energy production                                                 | Technical                    | Sectoral       |
| 2.7. Develop national expertise in energy efficiency                                                                                                                                | Technical                    | Sectoral       |
| 2.10. Raising awareness and supporting potential project holders                                                                                                                    | Participative<br>Integrative | Sectoral       |
| <b>Pillar 3 Forests</b>                                                                                                                                                             |                              |                |
| <b>A/ Sustainable management of forest carbon stocks (Permanent production forests and protected forests)</b>                                                                       |                              |                |
| 3.A.7. Promote greater processing of extracted wood                                                                                                                                 | Technical                    | Sectoral       |
| 3.A.9. Strengthen forest control by the administration or by independent observation, focusing on areas where illegal logging is strongest                                          | Functional                   | Institutional  |
| 3.A.10. Strengthen collaboration between the forest administration, border administrations and the judiciary in order to ensure the follow-up and eventual treatment of infractions | Integrative                  | Institutional  |
| 3.A.11. Strengthen the capacity of stakeholders to verify the implementation of the law and sanctions                                                                               | Functional<br>Participative  | Institutional  |
| 3.A.12. Establish upward and downward channels for the flow of forest information                                                                                                   | Functional                   | Sectoral       |

| REDD+ Strategy Capacity Building Activities                                                                                                                                     | Capacity Needs                             |                               |
|---------------------------------------------------------------------------------------------------------------------------------------------------------------------------------|--------------------------------------------|-------------------------------|
|                                                                                                                                                                                 | Type                                       | Scale                         |
|                                                                                                                                                                                 |                                            | Institutional                 |
| 3.A.13. Support the definition and implementation of the national system for monitoring and controlling the exploitation of forest resources, in synergy with the FLEGT process | Technical<br>Functional<br>Integrative     | Sectoral                      |
| 3.A.18. Raise awareness of sustainable forest management practices and build local capacity to support communities towards the sustainable management of their forest resources | Technical<br>Participative                 | Organisational                |
| 3.A.19. Accompany local communities in the establishment of community forest concessions and the elaboration of its management plan                                             | Functional<br><br>Participative?           | Organisational                |
| 3.A.20. Support the professionalization of micro-forestry operators from local communities who will be able to obtain community logging permits in these concessions            | Functional                                 | Organisational                |
| 3.A.21. Develop and implement a framework for contractualization between local communities and artisanal forest operators                                                       | Functional                                 | Institutional                 |
| 3.A.22. Strengthen the capacity of all stakeholders to monitor the proper implementation of forest management and development plans                                             | Functional<br>Participative<br>Integrative | Sectoral                      |
| 3.A.26. Strengthen the capacity of stakeholders to monitor the proper implementation of the artisanal mining law                                                                | Functional<br><br>Participative            | Sectoral<br><br>Institutional |
|                                                                                                                                                                                 | Functional                                 | Institutional                 |

| REDD+ Strategy Capacity Building Activities                                                                                                                            | Capacity Needs           |                              |
|------------------------------------------------------------------------------------------------------------------------------------------------------------------------|--------------------------|------------------------------|
|                                                                                                                                                                        | Type                     | Scale                        |
|                                                                                                                                                                        | Participative            |                              |
| 3.A.27. Ensure FPIC is respected in the contractual arrangements between local communities and artisanal forest operators.                                             |                          |                              |
| 3.A.28. Build the capacities of artisanal forest operators and support them in obtaining legal logging permits and formalizing the chain of custody                    | Functional               | Individual<br>Organisational |
| <b>B/ Conservation of forest carbon stocks (mainly classified forests)</b>                                                                                             |                          |                              |
| 3.B.5. Supporting community-based conservation and sustainable collaborative natural resource management                                                               | Functional               | Organisational               |
|                                                                                                                                                                        | Participative            | Sectoral                     |
| 3.B.6. Supporting the structuring of local communities and indigenous peoples and strengthening their capacities in the long term                                      | Functional               | Institutional                |
|                                                                                                                                                                        |                          |                              |
| <b>C/ Increasing forest carbon stocks (Permanent production forests, protected forests, classified forests and outside existing forests)</b>                           |                          |                              |
| 3.C.5. Raising awareness and building capacity on B/R and NAS and the opportunities provided by carbon finance                                                         | Functional               | Sectoral                     |
|                                                                                                                                                                        | Participative            |                              |
| 3.C.7. Promote the production from these plantations to meet national needs, ensure traceability and certification, and give them a comparative advantage              | Functional               | Sectoral                     |
| <b>Pillar 4: Governance</b>                                                                                                                                            |                          |                              |
| 4.2. Test, improve, and use online tools for cross-monitoring REDD+ implementation and impact: interconnection of the SNSF, the National REDD+ Registry, and the Moabi | Technical<br>Integrative | Organisational<br>Sectoral   |
| 4.3. Operationalizing the national REDD+ fund                                                                                                                          | Functional               | Institutional                |

| REDD+ Strategy Capacity Building Activities                                                                                                                                                                        | Capacity Needs                             |                                 |
|--------------------------------------------------------------------------------------------------------------------------------------------------------------------------------------------------------------------|--------------------------------------------|---------------------------------|
|                                                                                                                                                                                                                    | Type                                       | Scale                           |
| 4.6. Identify and involve the relevant authorities in the planning, implementation and monitoring phase of the activities                                                                                          | Participative                              | Organisational<br>Institutional |
| 4.7. Strengthen the capacity of stakeholders to play their roles in planning, implementing and monitoring REDD+                                                                                                    | Technical<br>Functional                    | Individual<br>Organisational    |
| 4.9. Support consultation and conflict management frameworks for programming, monitoring-evaluation and control of REDD activities at the national, provincial and local levels                                    | Participative (Deliberative)<br>Functional | Sectoral<br>Institutional       |
| 4.10. Support the emergence and capacity building of national service companies in support of REDD+                                                                                                                | Functional                                 | Organisational                  |
| 4.12. Implement monitoring mechanisms on the ground to deal with complaints received and compliance with national standards                                                                                        | Functional                                 | Institutional                   |
| 4.14. Strengthen the implementation of national legal instruments and popularize them                                                                                                                              | Technical<br>Functional<br>Participative   | Institutional                   |
| <b>Pillar 5 Demography</b>                                                                                                                                                                                         |                                            |                                 |
| 5.4. Increasing girls' access to education                                                                                                                                                                         | Functional<br>Participative                | Sectoral                        |
| <b>Pillar 6: Regional Planning</b>                                                                                                                                                                                 |                                            |                                 |
| 6.3. Strengthen the capacities of the state bodies in charge of producing geographic and socio-economic data (IGC and INS) and relaunch the Common Geographic Reference System (CGRS)                              | Technical                                  | Organisational<br>Institutional |
| 6.16. Popularize and train the various stakeholders in the implementation of the selected methodologies (manual and training) [methodologies for microzoning at the village terroir level (participatory mapping)] | Technical                                  | Individual<br>Organisational    |
| 6.18. Support consultation structures to follow up the land-use and micro-zoning plans                                                                                                                             | Technical                                  | Individual                      |

| REDD+ Strategy Capacity Building Activities                                                                                             | Capacity Needs              |                              |
|-----------------------------------------------------------------------------------------------------------------------------------------|-----------------------------|------------------------------|
|                                                                                                                                         | Type                        | Scale                        |
|                                                                                                                                         | Participative               | Organisational               |
| 6.19. Training and accreditation of independent experts in microzoning and verification of socio-environmental standards                | Technical                   | Individual<br>Organisational |
| <b>Pillar 7: Land</b>                                                                                                                   |                             |                              |
| 7.9. Strengthen land administration capacities in the areas targeted for REDD+ investments (local land services)                        | Functional                  | Institutional                |
| 7.10. Train stakeholders in the implementation of the methodologies for the identification of defined land rights (manual and training) | Technical<br>Functional     | Individual<br>Organisational |
| 7.11. Forming a service to offer support local land administration for the identification of land rights                                | Functional                  | Institutional                |
| 7.12. Train and accredit experts on general socio-environmental standards and land rights identification methodology(ies).              | Technical<br>Functional     | Individual<br>Organisational |
| 7.13. Popularize the land law and build the capacities of consultation frameworks and various stakeholders                              | Participative<br>Functional | Organisational               |
